# Supplementary material
Source: PubMed Central journal article supplement (PMC9309866)

Supplemental figure 1

△ Male veh    ○ Female veh  
▲ Male IMI    ● Female IMI

### Active Lever

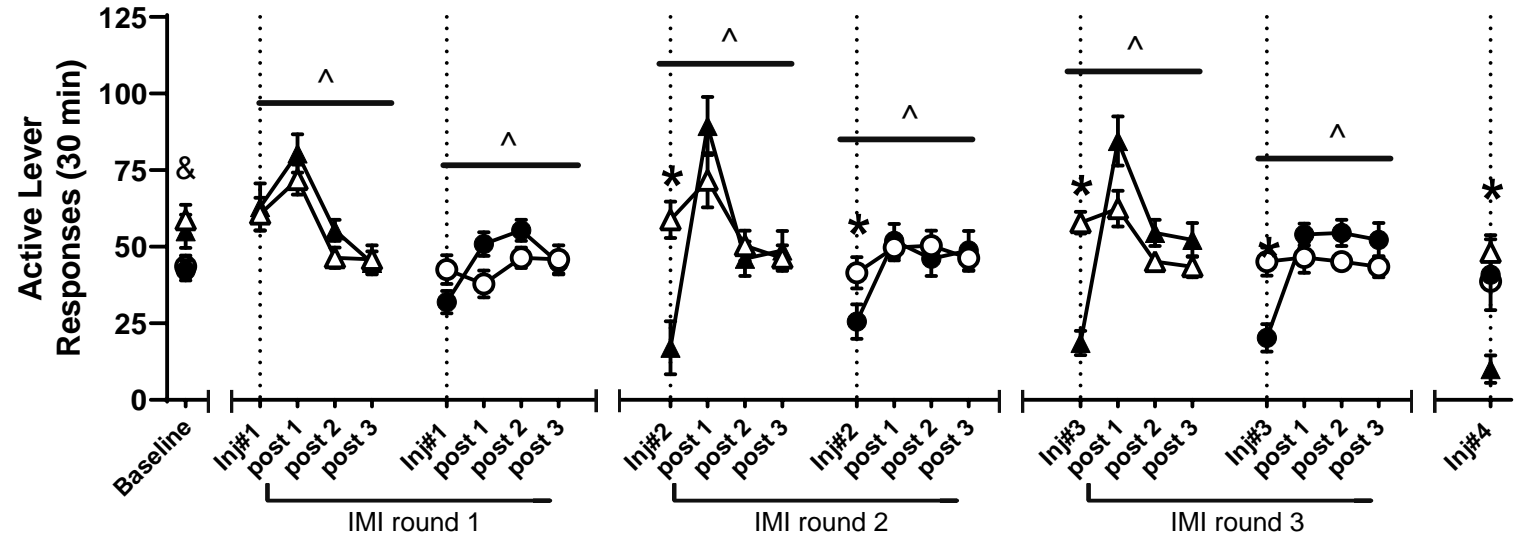

Supplement: NIHMS1820072-supplement-1.pdf [file NIHMS1820072-supplement-1.pdf]
